# Supplementary material for: The Bile Acid Nuclear Receptor FXRα Is a Critical Regulator of Mouse Germ Cell Fate
Source: PubMed Central journal article supplement — Stem Cell Reports. 2017 Jun 29;9(1):315–28. doi: 10.1016/j.stemcr.2017.05.036 (PMC5511114; doi:10.1016/j.stemcr.2017.05.036), 2017-06-29
Supplement: mmc1.pdf [file mmc1.pdf]

**Stem Cell Reports, Volume 9**

**Supplemental Information**

**The Bile Acid Nuclear Receptor FXR $\alpha$  Is a Critical Regulator of Mouse  
Germ Cell Fate**

**Emmanuelle Martinot, Lauriane Sèdes, Marine Baptissart, Hélène Holota, Betty Rouaisnel, Christelle Damon-Soubeyrand, Angélique De Haze, Jean-Paul Saru, Christelle Thibault-Carpentier, Céline Keime, Jean-Marc A. Lobaccaro, Silvère Baron, Gérard Benoit, Françoise Caira, Claude Beaudoin, and David H. Volle**

**A****Spz number relative to testis weight**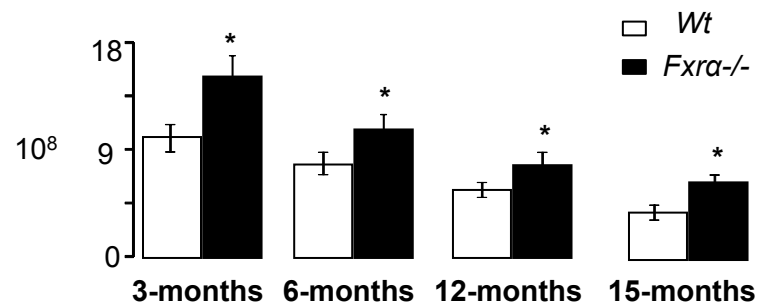**B**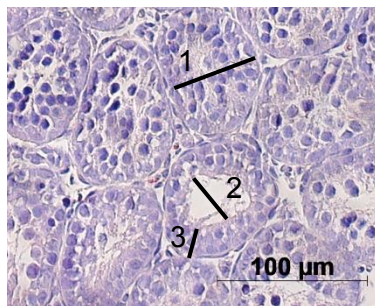

1: illustrate the diameter of the seminiferous tubule

2: illustrate the diameter of the lumen

3: illustrate the height of the epithelium

**C****HE from 1 to 12 months**

15dpn

1 month

3 months

6 months

12 months

**Wt**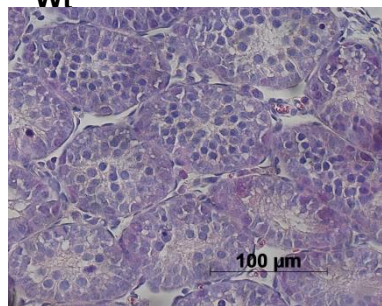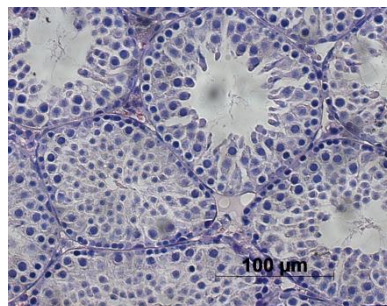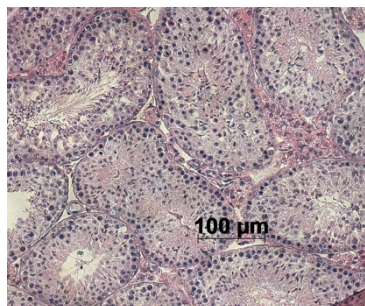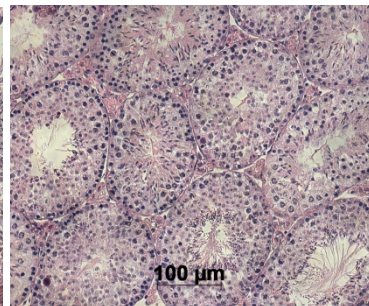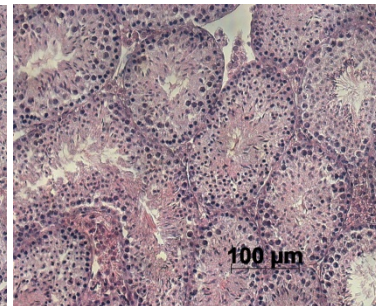***Fxrα*<sup>-/-</sup>**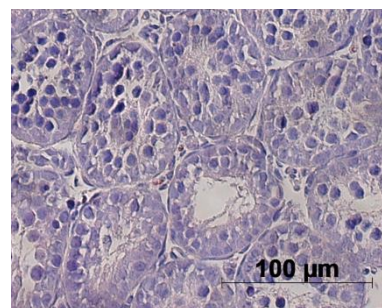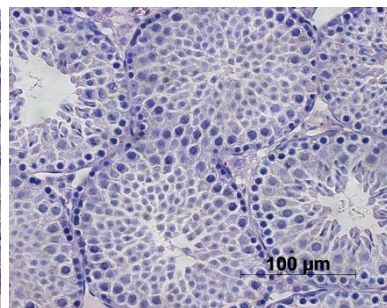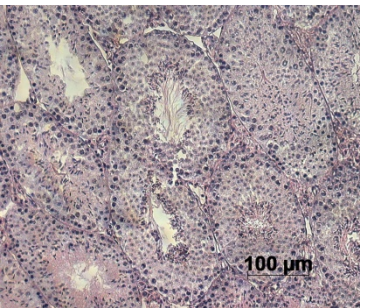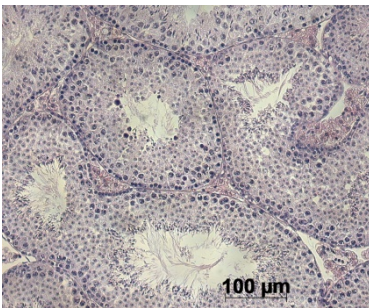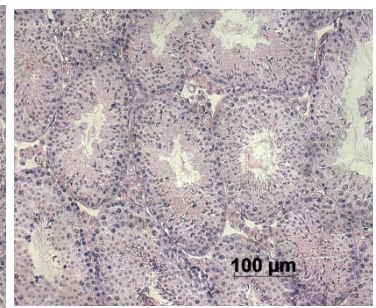

**Figure S 1. Illustrates the sperm production and testicular histology, Related to Figure 1**

**A/** Relative number of sperm count in the epididymis head normalized to body weight in wild-type and *Fxrα*<sup>-/-</sup> at 3, 6, 12 or 15-month-old.

**B/** A Representative image of a 10dpn testis; it is illustrate here the way how were quantified the diameter of the seminiferous tubule and the height of the epithelium.

**C/** Representative images of a testis stained with eosine hematoxyline from wild-type and *Fxrα*<sup>-/-</sup> at 15dpn, 1, 3, 6, 12 or 15-month-old.

In all panel for each group, n =10 males from 3 to 4 independent litters; \* denotes significance; p<0.05.

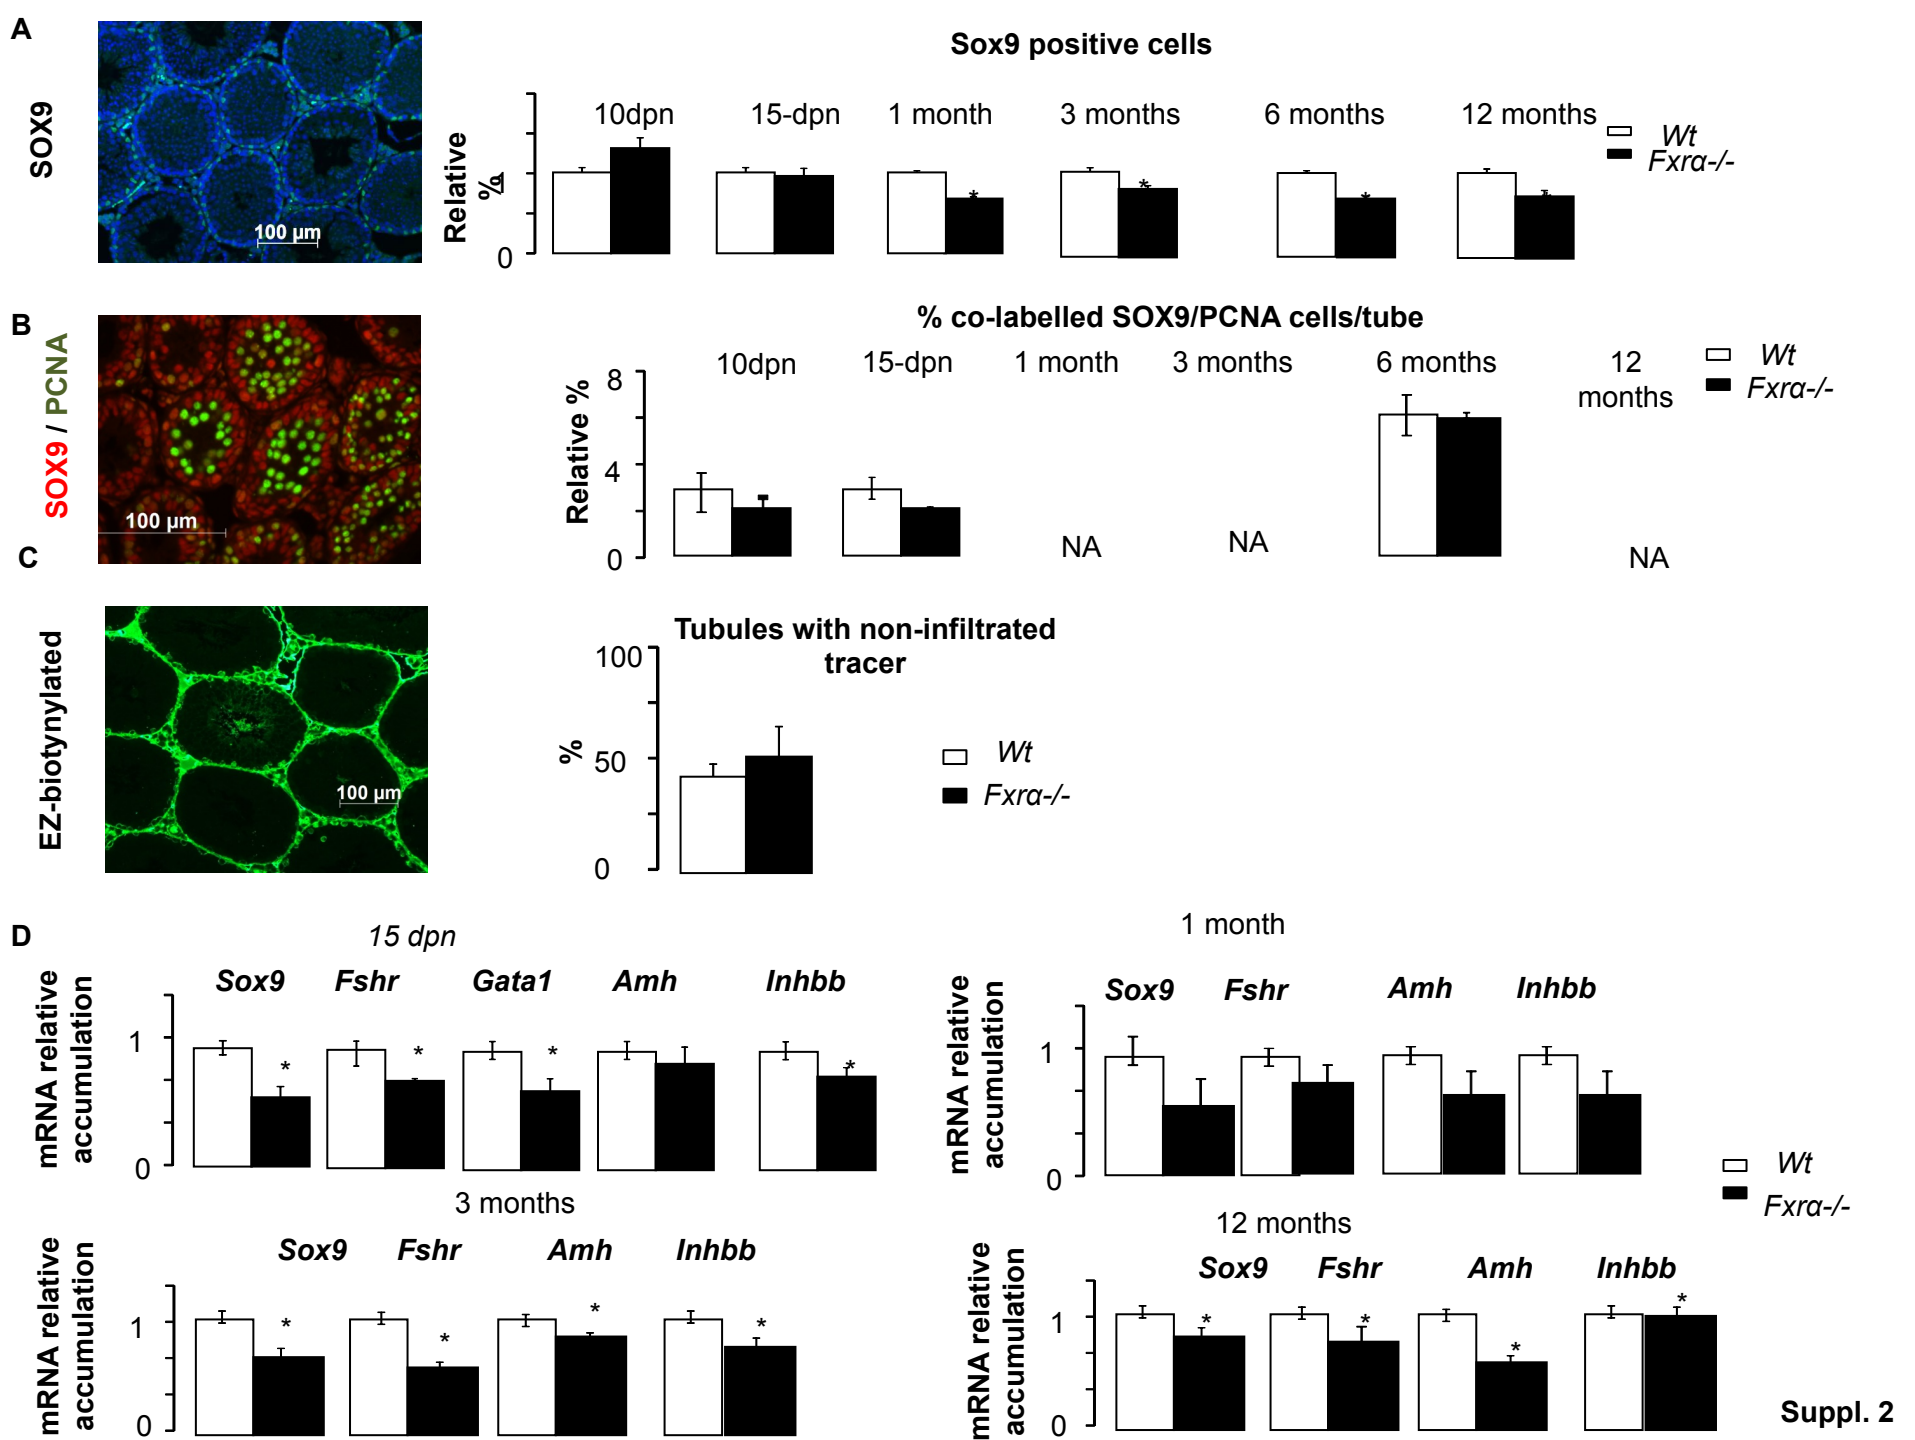

**Figure S 2. Impact of *Fxrα* deficiency on Sertoli cell homeostasis, Related to figure 2.**

**A/** Representative micrograph of the SOX9 staining in testis of *Fxrα*<sup>-/-</sup> male at 15 dpn. Quantification of the number of SOX9 positive cells is indicated as the number of positive cells per 100 seminiferous tubule in wild-type and *Fxrα*<sup>-/-</sup> mice at 10dpn, 15dpn, 1 months, 6 months and 12 months. **B/** Representative micrograph of the testis of 15-day-old *Fxrα*<sup>-/-</sup> male. Stained for PCNA and, SOX9. The original magnification was x200. Quantification of the percentage of cells co-labeled for PCNA and SOX9 per seminiferous tubule in wild-type and *Fxrα*<sup>-/-</sup> mice at 10dpn, 15dpn, 1 months, 6 months and 6 months. **C/** Representative micrograph of the efficiency of the BTB in testis of *Fxrα*<sup>-/-</sup> mice at 15 dpn visualized by staining of a biotinylated tracer. Quantification of the percentage of seminiferous tubules with tracer infiltration. **D/** Testicular mRNA accumulation of *Sox9*, *Fshr*, *Inhbb* and *Amh* normalized to β-actin mRNA levels in the whole testes of wild-type and *Fxrα*<sup>-/-</sup> mice at 15 days old, 1 month, 3 months and 12 months. In all panels for each group, n =6 males from 4 independent litters; \* denotes significance; p<0.05.

**A****Intra-testicular testosterone**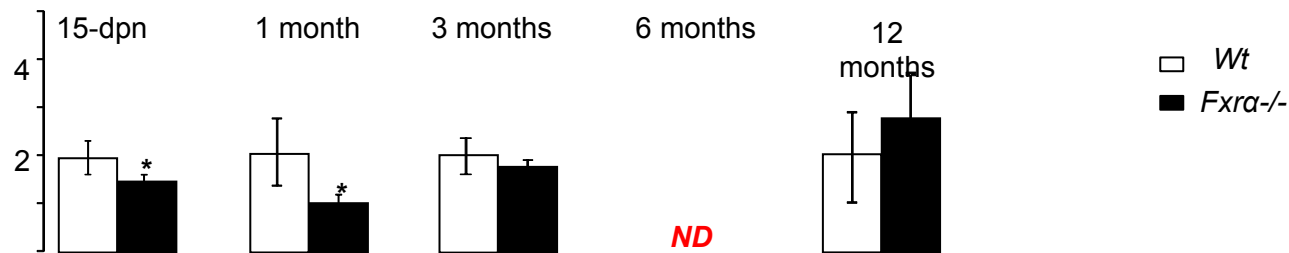**B**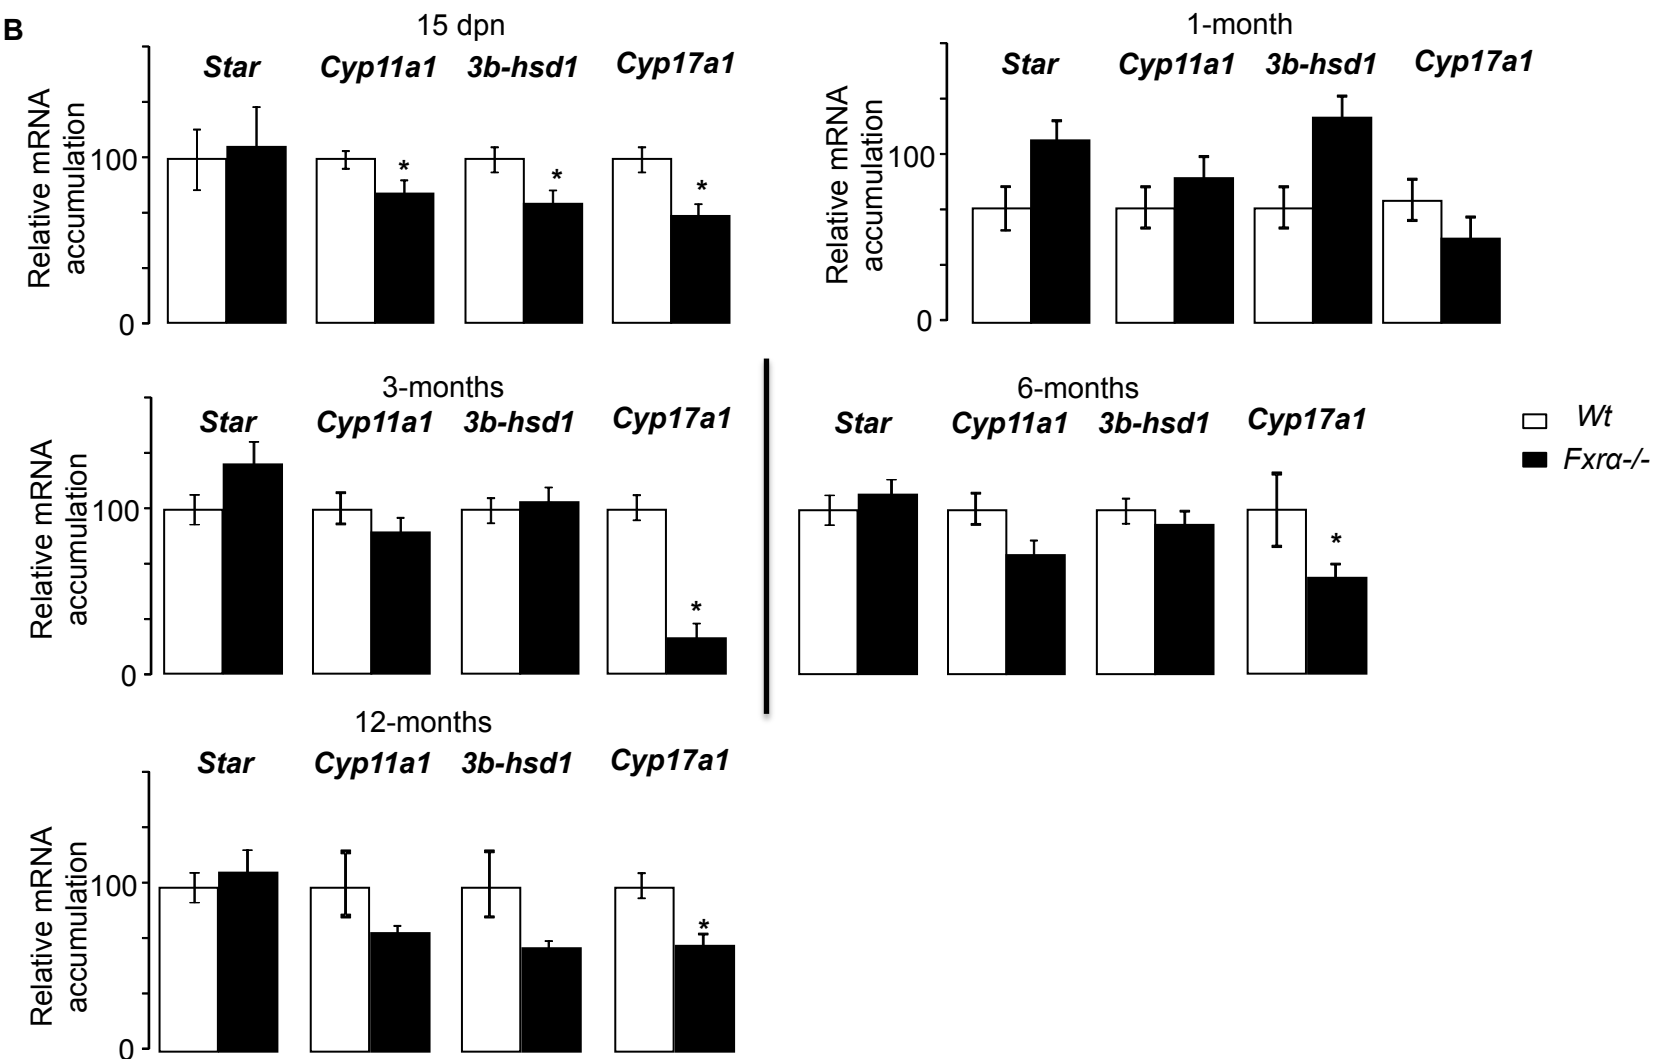

**Figure S 3. Impact of *Fxr* $\alpha$  deficiency on Leydig cell homeostasis, Related to figure 2.**

**A/** Intra-testicular testosterone concentrations in wild-type and *Fxr* $\alpha$ <sup>-/-</sup> mice at 15 dpn, 1 month, 3 months, 6 months and 12 months. **B/** Testicular mRNA accumulation of *Star*, *Cyp11a1*, *3 $\beta$ -Hsd1* and *Cyp17a1* normalized to  *$\beta$ -actin* mRNA levels in the whole testes of wild-type and *Fxr* $\alpha$ <sup>-/-</sup> mice at 15 dpn, 1 month, 3 months, 6 months and 12 months.

In all panels for each group, n =6 to 10 males from 4 to 5 independent litters; \* denotes significance; p<0.05.



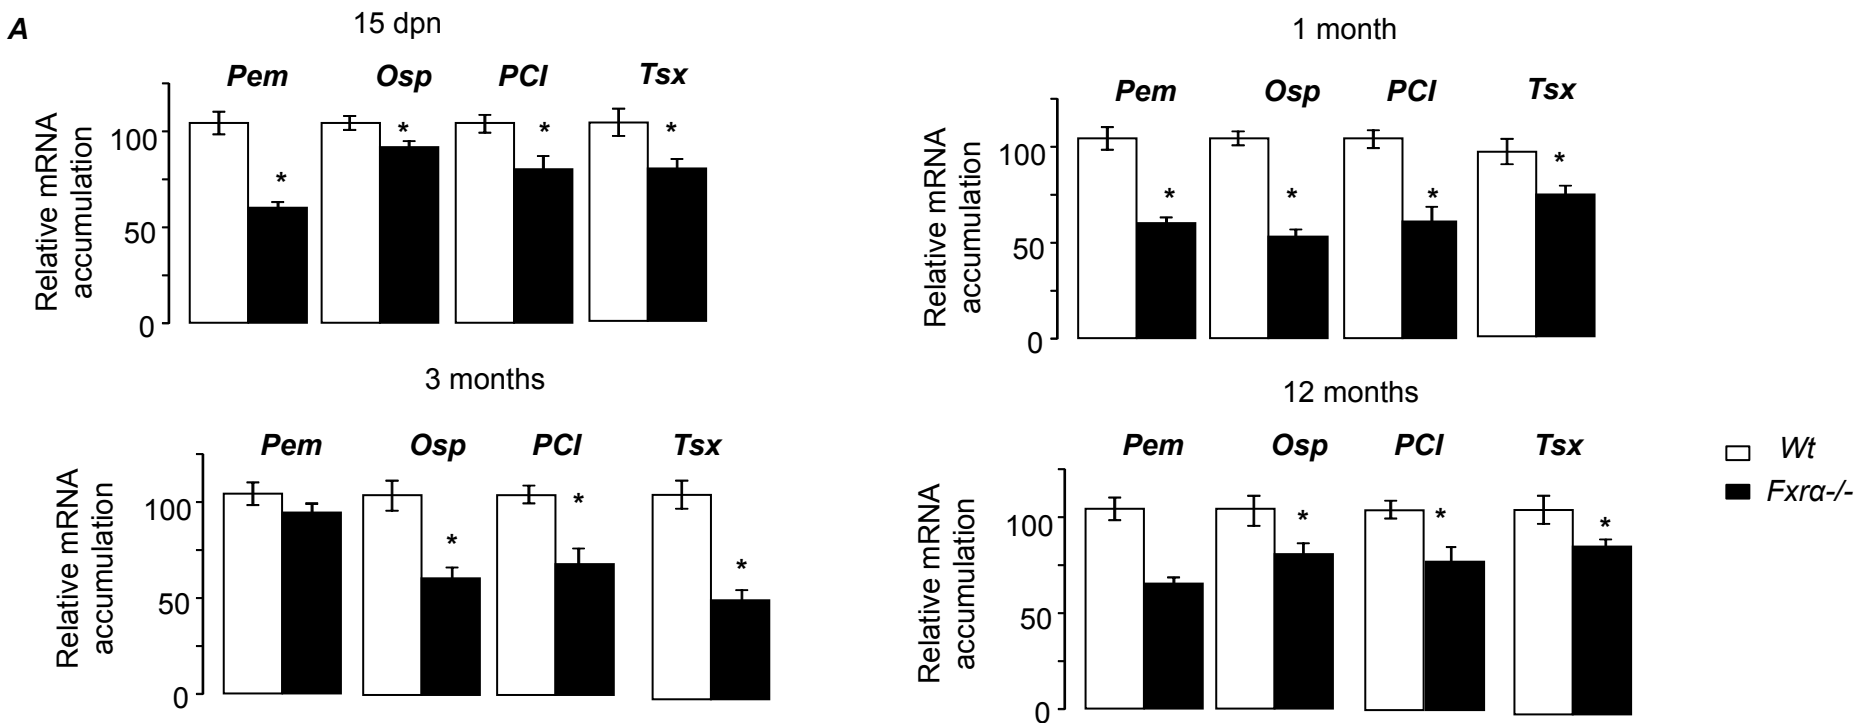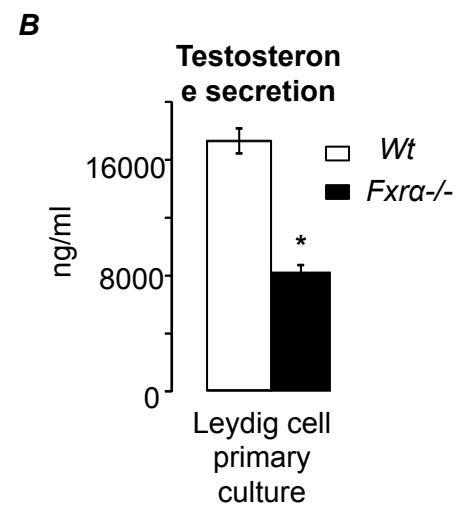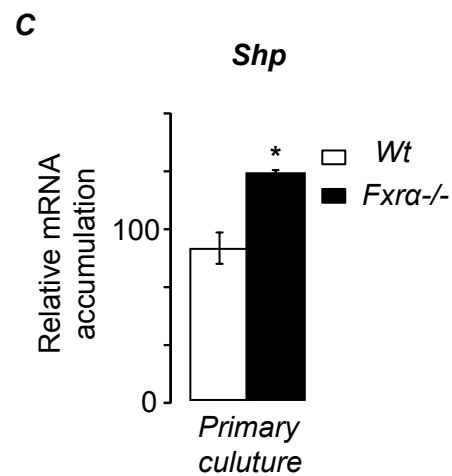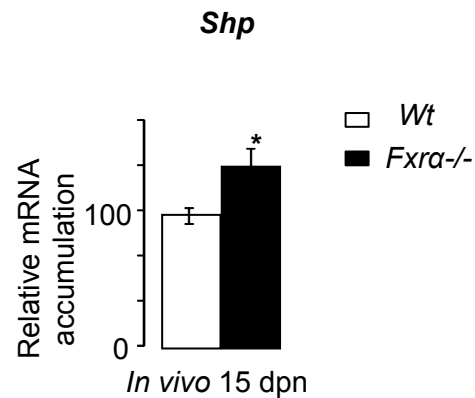



**Figure S 4. Impact of *Fxrα* deficiency on expression of androgeno-dependent genes, Related to figure 2.**

**A/** Testicular mRNA accumulation of *Pem*, *Osp*, *Pci* and *Tsx* normalized to  $\beta$ -*actin* mRNA levels in the whole testes of wild-type and *Fxrα*<sup>-/-</sup> mice at 15 dpn, 1 month, 3 months and 12 months. **B/** Testosterone secretion in Leydig cells (primary culture) from adult *wild-type* and *Fxrα*<sup>-/-</sup> mice. **C/** mRNA accumulation of *Shp* normalized to  $\beta$ -*actin* mRNA levels evaluated in Leydig cells (primary culture) from 3 month-old *wild-type* and *Fxrα*<sup>-/-</sup> mice or in the whole testes of wild-type and *Fxrα*<sup>-/-</sup> mice at 3 months.

In panels B and C, results were obtained from one experiment of primary culture from 20 Wt or 20 *Fxrα*<sup>-/-</sup> males.

In panel A & C, for in vivo experiments each group, n =6 males from 4 independent litters; \* denotes significance; p<0.05.

**A****% of tubules with post-meiotic cells (H4ac+)**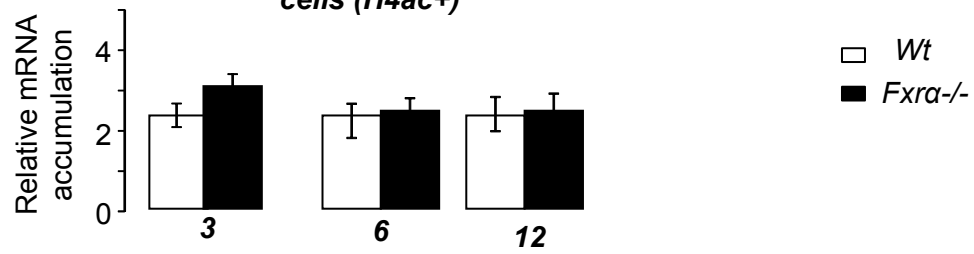**B**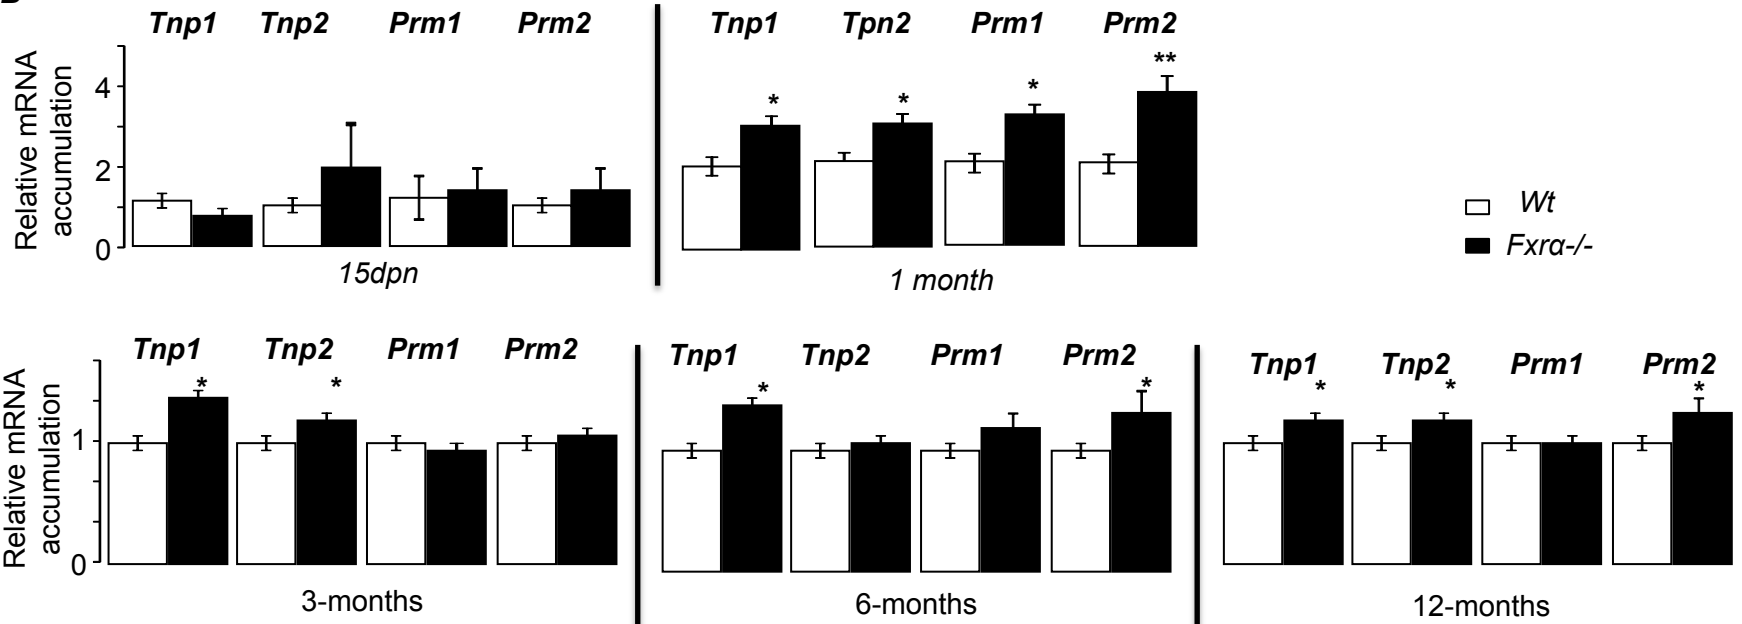

**Figure S 5. Fxr $\alpha$  deficiency improves germ cell differentiation, Related to figure 2.**

**A/** Quantification of the percentage of seminiferous tubules showing elongated H4ac positive germ cells in *wild-type* and *Fxr $\alpha$ <sup>-/-</sup>* mice from 3, 6 and 12 months of age.

**B/** Testicular mRNA accumulation of *Tpn1*, *Tpn2*, *Prm1* and *Prm2* normalized to  $\beta$ -*actin* mRNA levels *wild-type* and *Fxr $\alpha$ <sup>-/-</sup>* mice at 15dpn, 1 month, 3 months and 12 months. .

In all panel for each group, n =5 to 10 males from 3 to 4 independent litters; \* denotes significance; p<0.05.

A

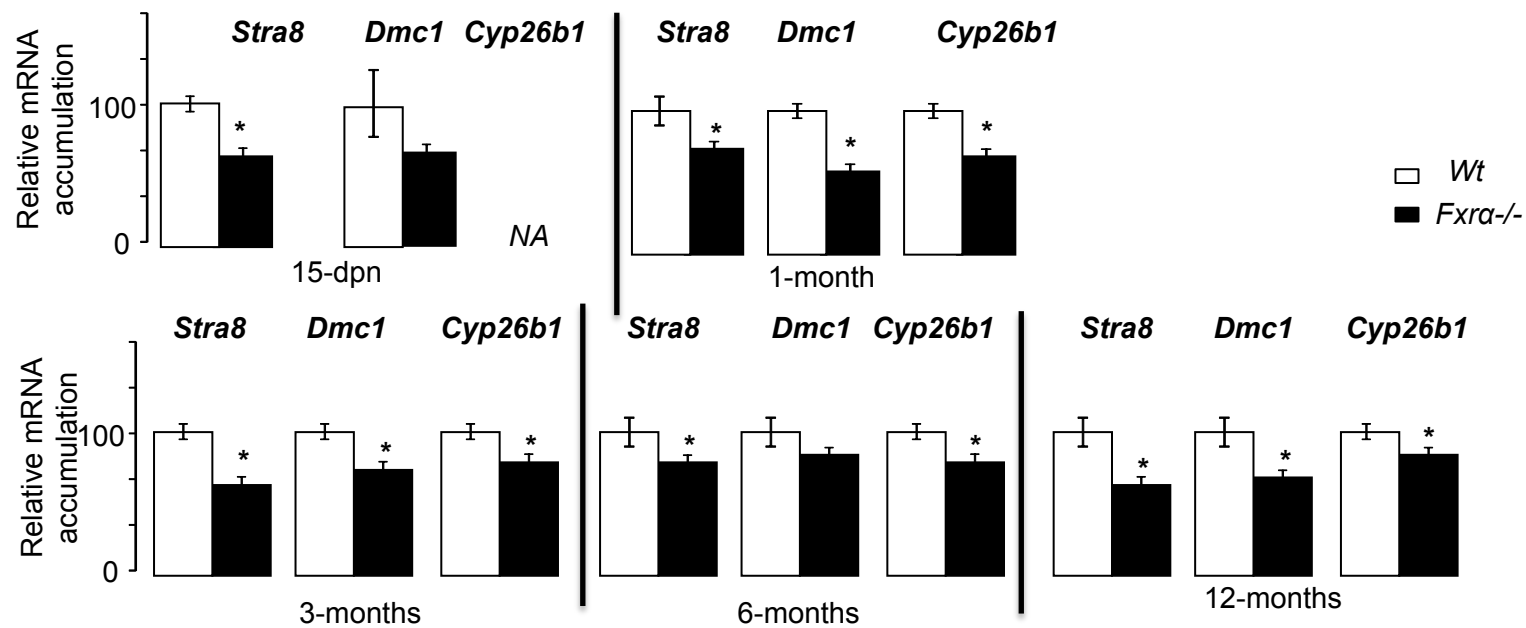

B

## Adult exposure to busulfan

## Busulfan 4 weeks

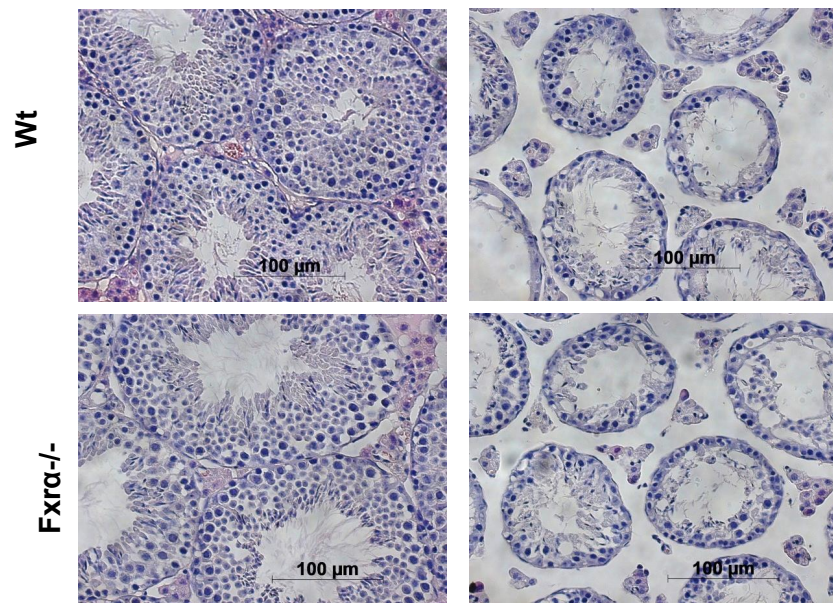

C

## Adult exposure to busulfan

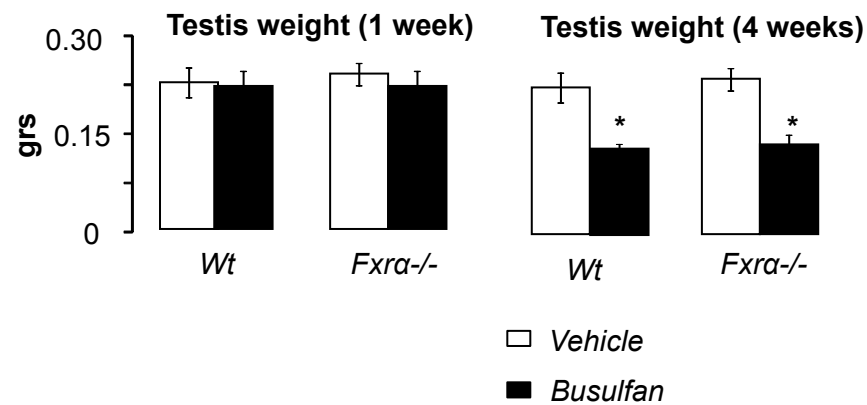

**Figure S 6. Fxr $\alpha$  deficiency alters the expression of meiotic genes, Related to figure 3.**

**A/** Testicular mRNA accumulation of *Stra8*, *Dmc1* and *Cyp26b1* normalized to  $\beta$ -actin mRNA levels in *wild-type* and *Fxr $\alpha$ <sup>-/-</sup>* mice at 15dpm, 1 month, 3 months, 6 months and 12 months. n=5-10 per group from 4 to 5 independent litters; \* denotes significance; p<0.05. **B/** Representative micrographs of the testis H&E stained from 3 months old *wild-type* and *Fxr $\alpha$ <sup>-/-</sup>* mice treated with busulfan. **C/** Testis weights in *wild-type* and *Fxr $\alpha$ <sup>-/-</sup>* mice from 1 week and 4 weeks after busulfan exposure. In all panel n=5 to 6- per group from 3 different litters; \* denotes significance; p<0.05.

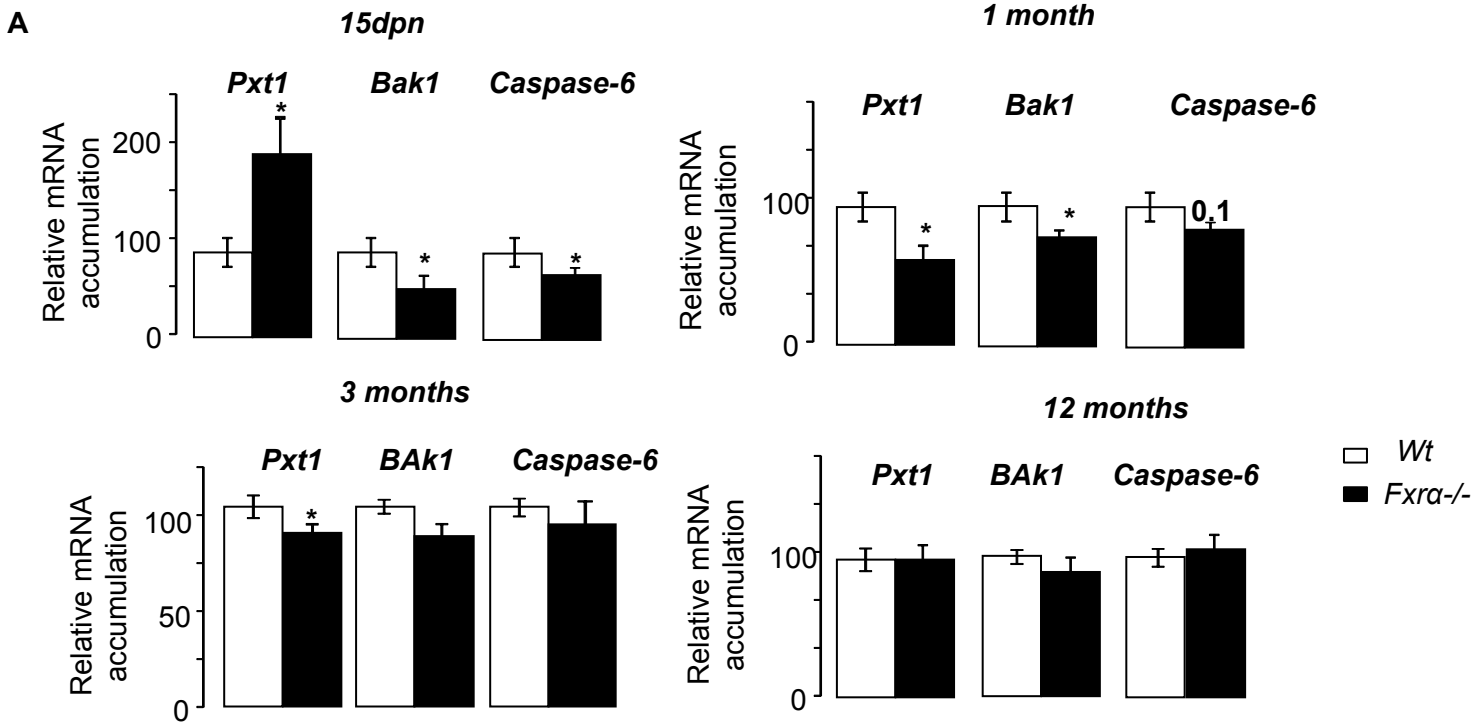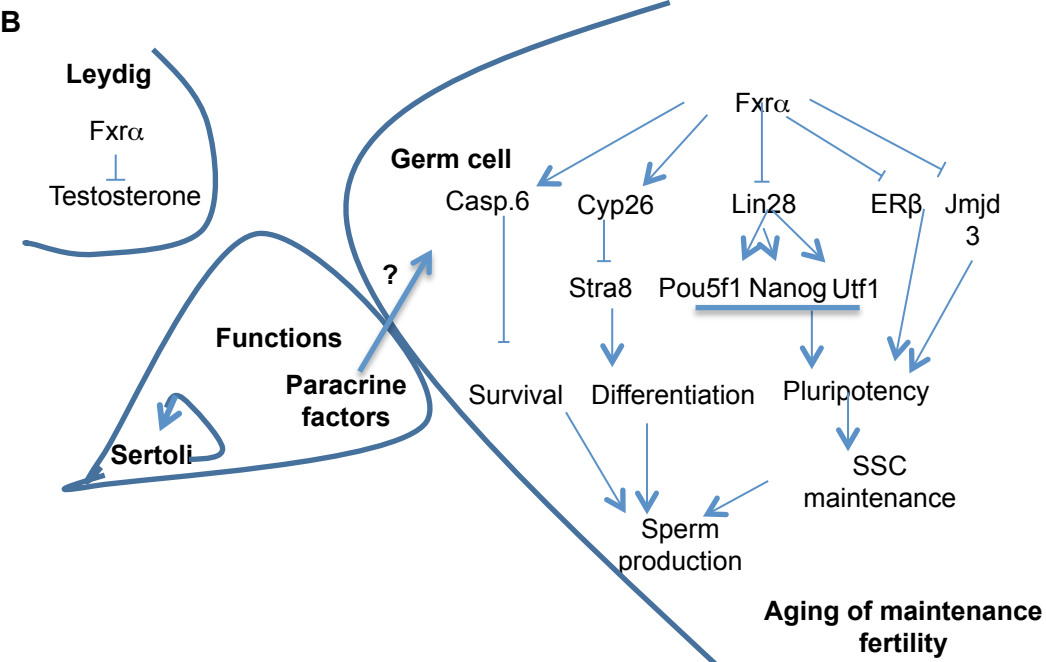

**Figure S 7. Fxr $\alpha$  deficiency alters the expression of genes involved in apoptosis, Related to figure 5**

**A/** Testicular mRNA accumulation of *Pxt1*, *Bak1* and *Caspase-6* normalized to  $\beta$ -*actin* mRNA levels in the whole testes of wild-type and Fxr $\alpha$ <sup>-/-</sup> mice at 15 dpn, 1 month, 3 months, 6 months and 12 months. For each group, n =5 to 10 males from 3 to 4 independent litters; \* denotes significance; p<0.05.

**B/** Schematic model representing the putative roles of FXR $\alpha$  on testicular physiology.
